# Supplementary material
Source: MDPI journal article supplement (https://www.mdpi.com/2304-6740/6/1/6)
Supplement: s1 [file s1]

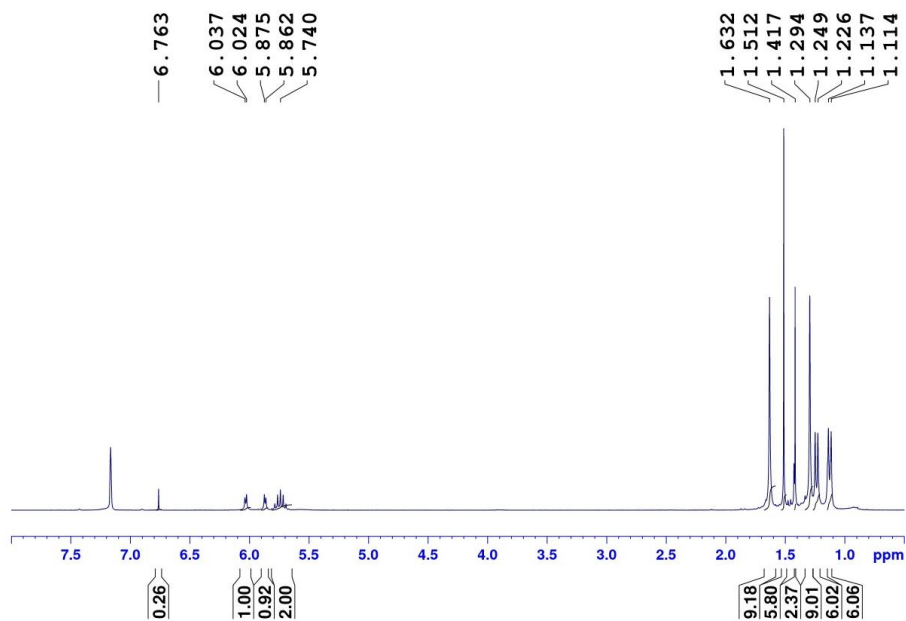

**Figure S1.** <sup>1</sup>H NMR of **1** in [D<sub>6</sub>]-benzene at RT.

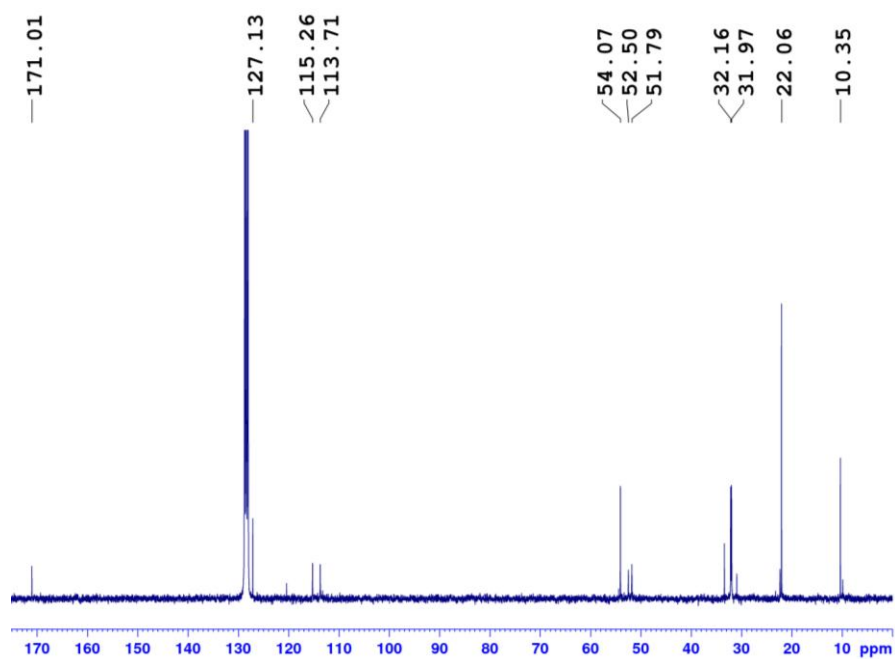

**Figure S2.** <sup>13</sup>C{H} NMR of **1** in [D<sub>6</sub>]-benzene at RT.

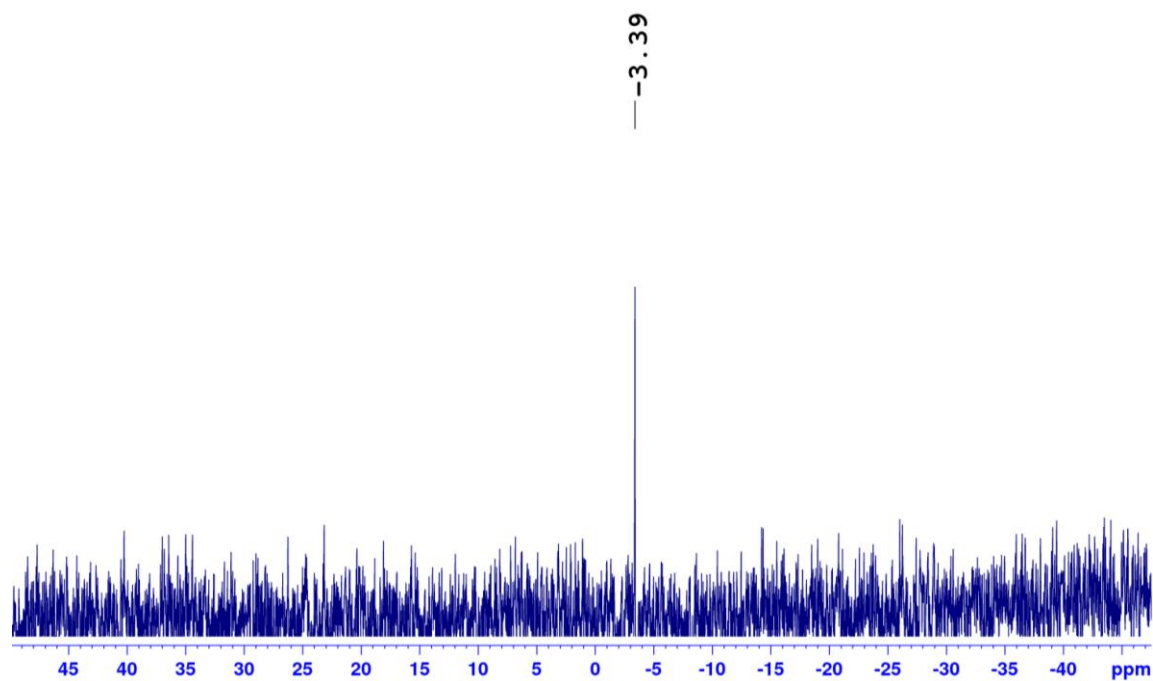

**Figure S3.**  $^{29}\text{Si}\{\text{H}\}$  NMR of **1** in  $[\text{D}_6]$ -benzene at RT.
